# Supplementary material for: Highly efficient visible-light induced N-doped ZnO@g-C3N4 and S-doped ZnO@g-C3N4 photocatalysts for environmental remediation
Source: Royal Society of Chemistry journal article supplement (doi:10.1039/d3ra06488c), 2024-01-01
Supplement: d3ra06488c1.pdf [file d3ra06488c1.pdf]

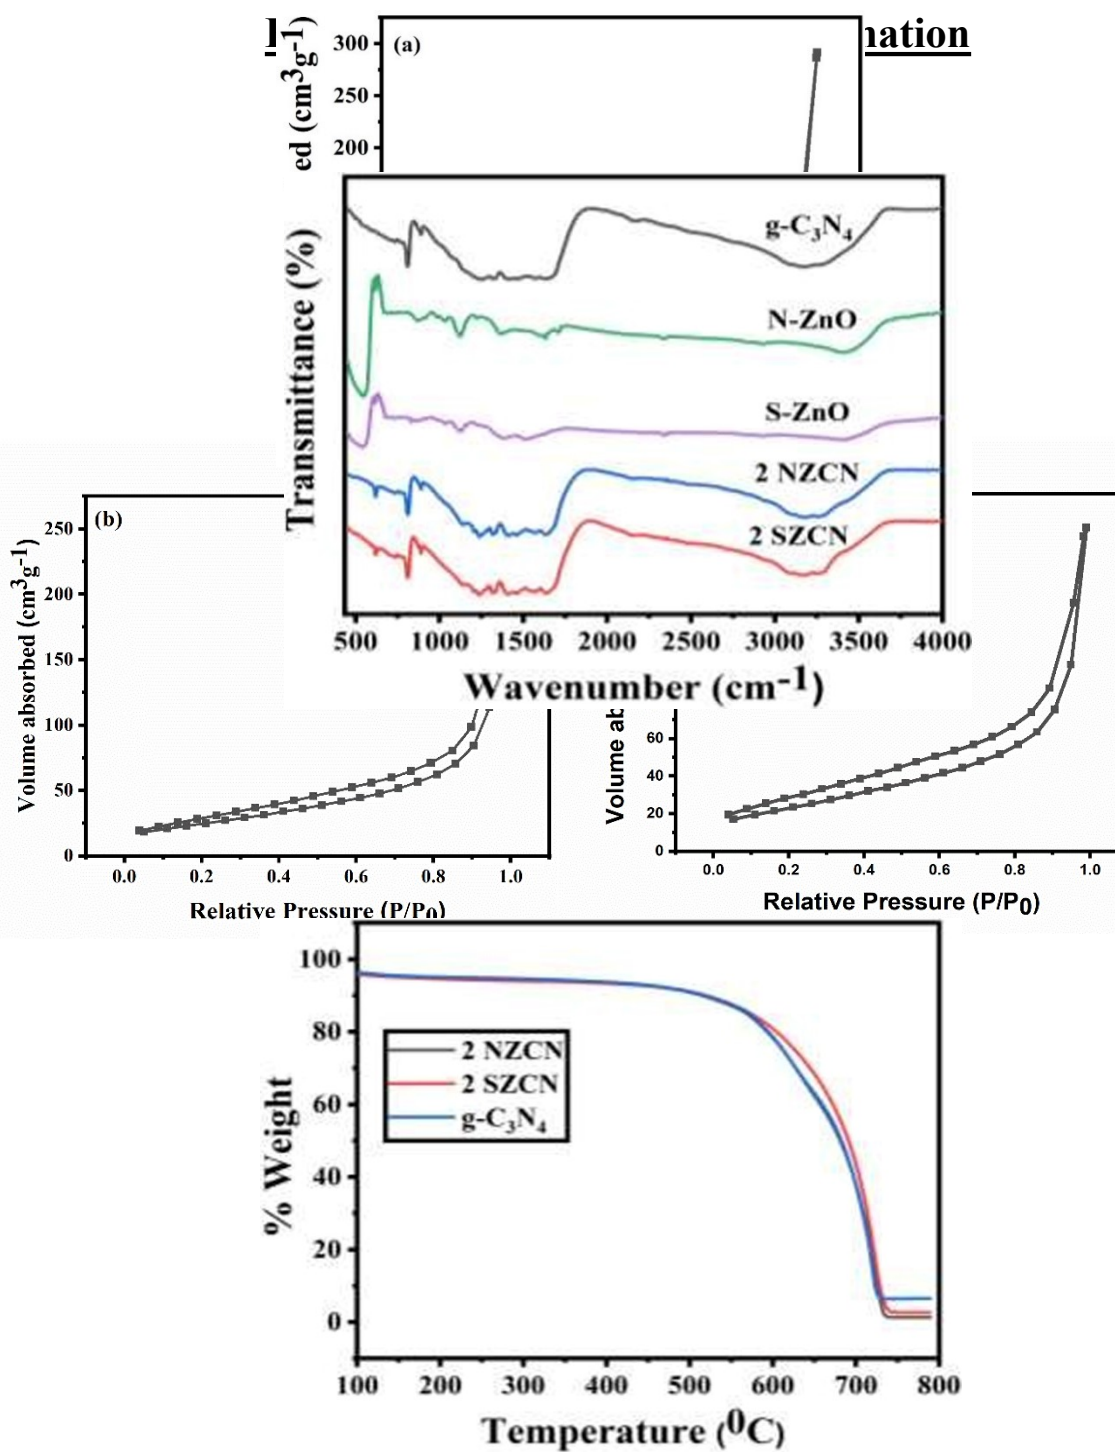

Figure S2. TG/DTA curves of g-C<sub>3</sub>N<sub>4</sub>, 2 NZCN and 2 SZCN nanocomposite

**Figure S3.** N<sub>2</sub> adsorption-desorption isotherm of (a) g-C<sub>3</sub>N<sub>4</sub> (b) 2 NZCN (c) 2 SZCN nanocomposite

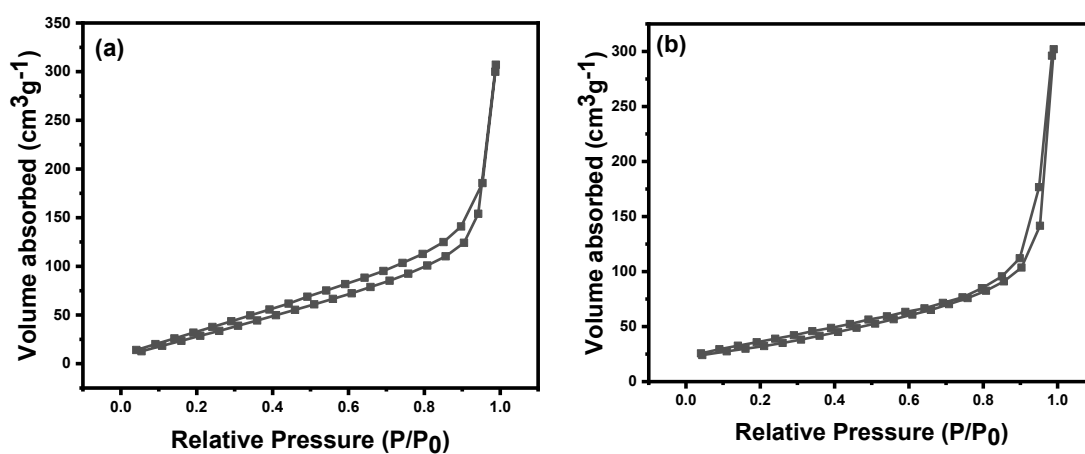

**Figure S4.** N<sub>2</sub> adsorption-desorption isotherm of (a) N-doped ZnO (b) S-doped ZnO.

**Table S1** BET surface areas of as-prepared photocatalysts.

| Photocatalyst                   | BET Surface Area<br>(m <sup>2</sup> g <sup>-1</sup> ) |
|---------------------------------|-------------------------------------------------------|
| g-C <sub>3</sub> N <sub>4</sub> | 66.5                                                  |
| N-ZnO                           | 47.2                                                  |
| S-ZnO                           | 33.3                                                  |
| 1 NZCN                          | 111.2                                                 |
| 1 SZCN                          | 108.0                                                 |
| 2 NZCN                          | 89.1                                                  |
| 2 SZCN                          | 84.2                                                  |
| 4 NZCN                          | 76.5                                                  |
| 4 SZCN                          | 68.0                                                  |
| 6 NZCN                          | 66.5                                                  |
| 6 SZCN                          | 63.1                                                  |

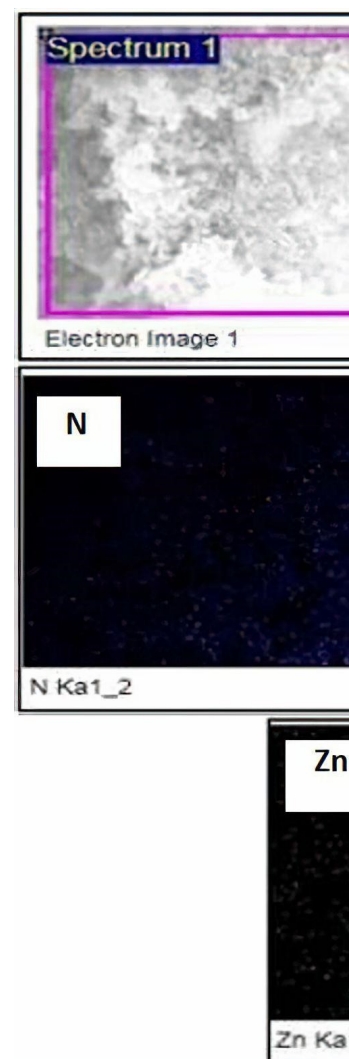

**Figure S5.** EDX elemental mapping of 2 NZCN nanocomposite.

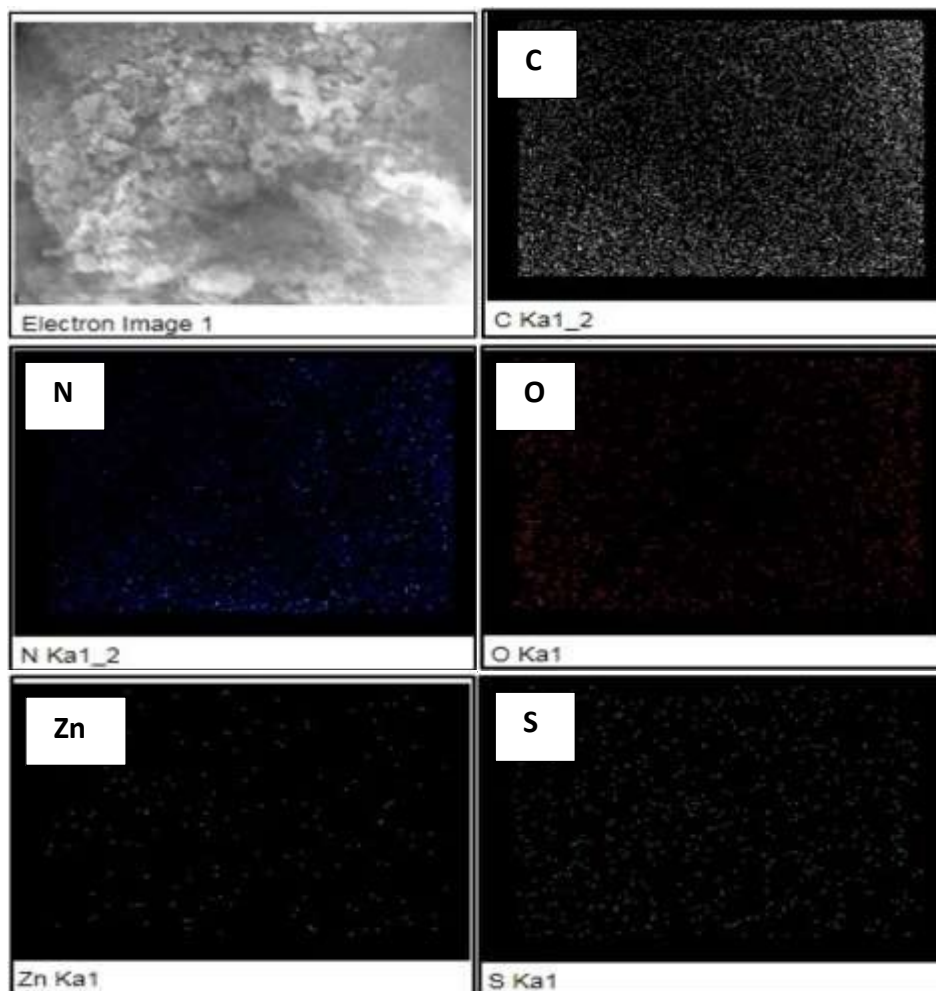

**Figure S6.** EDX elemental mapping of 2 SZCN nanocomposite.

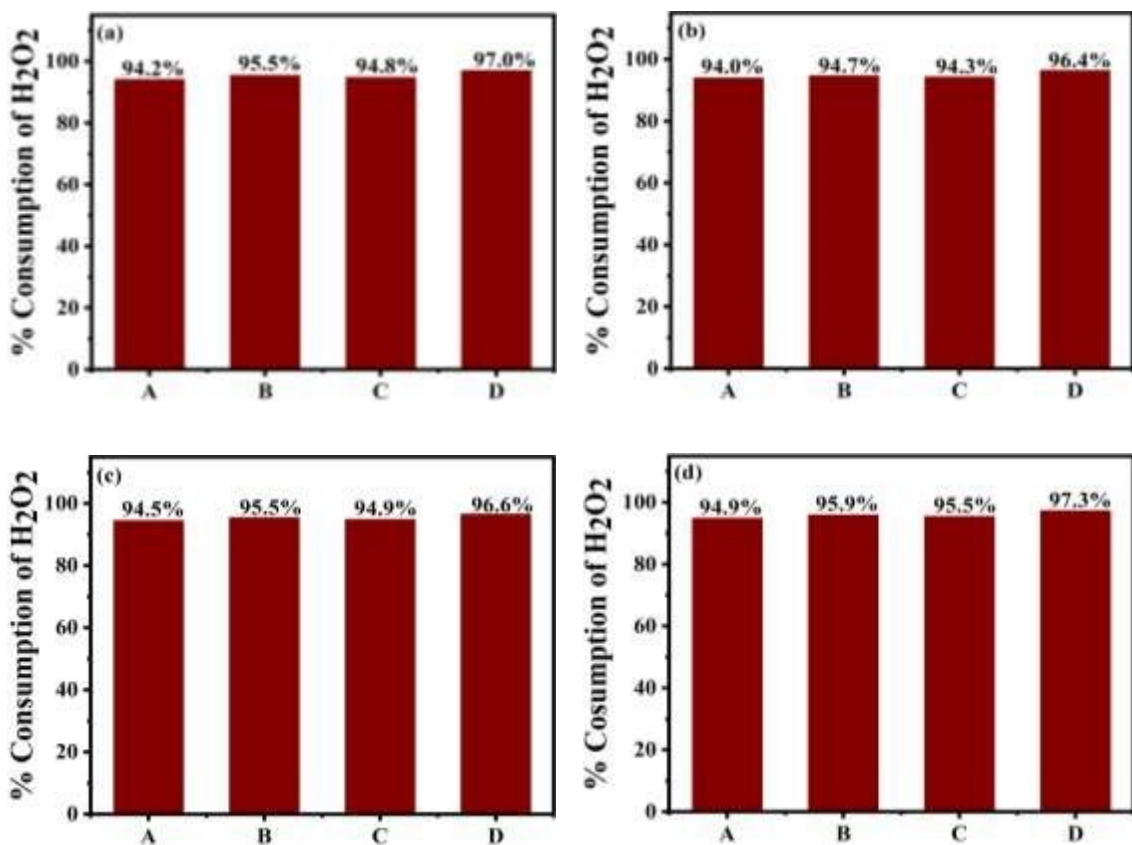

5

**Figure S7.** Consumption of H<sub>2</sub>O<sub>2</sub> in photodegradation of (a) CV by 2 NZCN photocatalyst (b) CV by 2 SZCN photocatalyst (c) BG by 2 NZCN photocatalyst, and (d) BG by 2 SZCN photocatalyst under various conditions (A) H<sub>2</sub>O<sub>2</sub>, (B) H<sub>2</sub>O<sub>2</sub>/Vis, (C) Cat/H<sub>2</sub>O<sub>2</sub>, (D) Cat/H<sub>2</sub>O<sub>2</sub>/Vis.

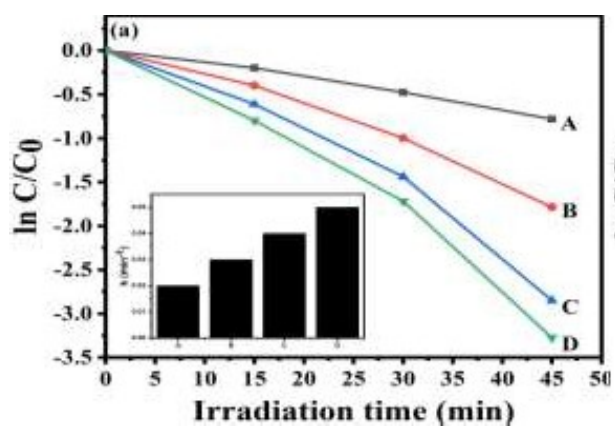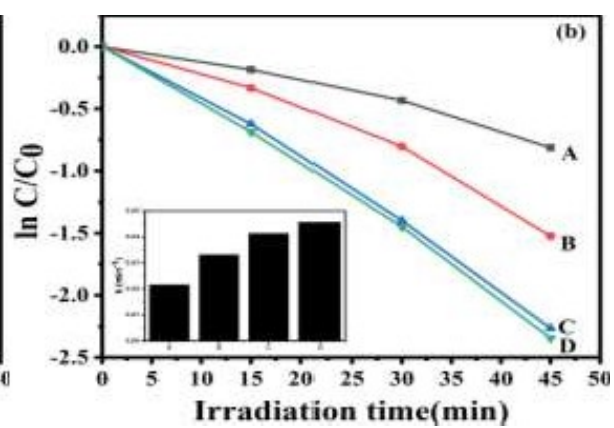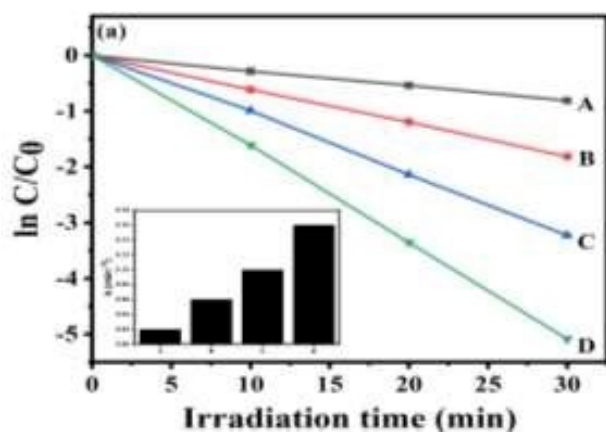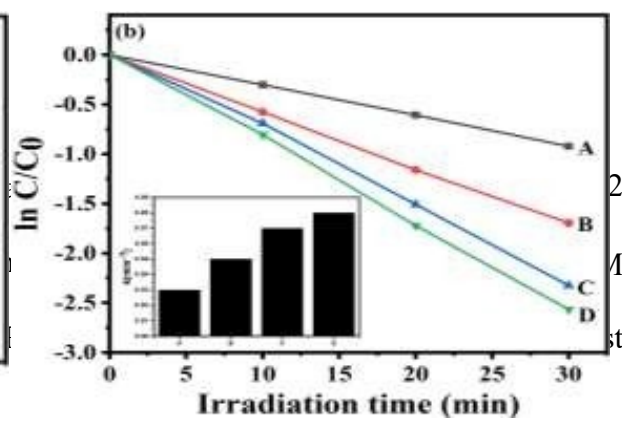

**Figure S9.** Kinetics of photodegradation of (a) BG by 2 NZCN nanocomposite and (b) BG by 2 SZCN nanocomposite over different  $H_2O_2$  concentration (A) 0.005 M (B) 0.01 M (C) 0.15 M (D) 0.10 M. Inset: degradation rate constant  $k$ . (Reaction conditions:  $[Dye] = 100 \text{ mg/L}$ , Catalyst = 200 mg/L,  $T = 25 \text{ }^\circ\text{C}$ ,  $\text{pH} = 6$ ).

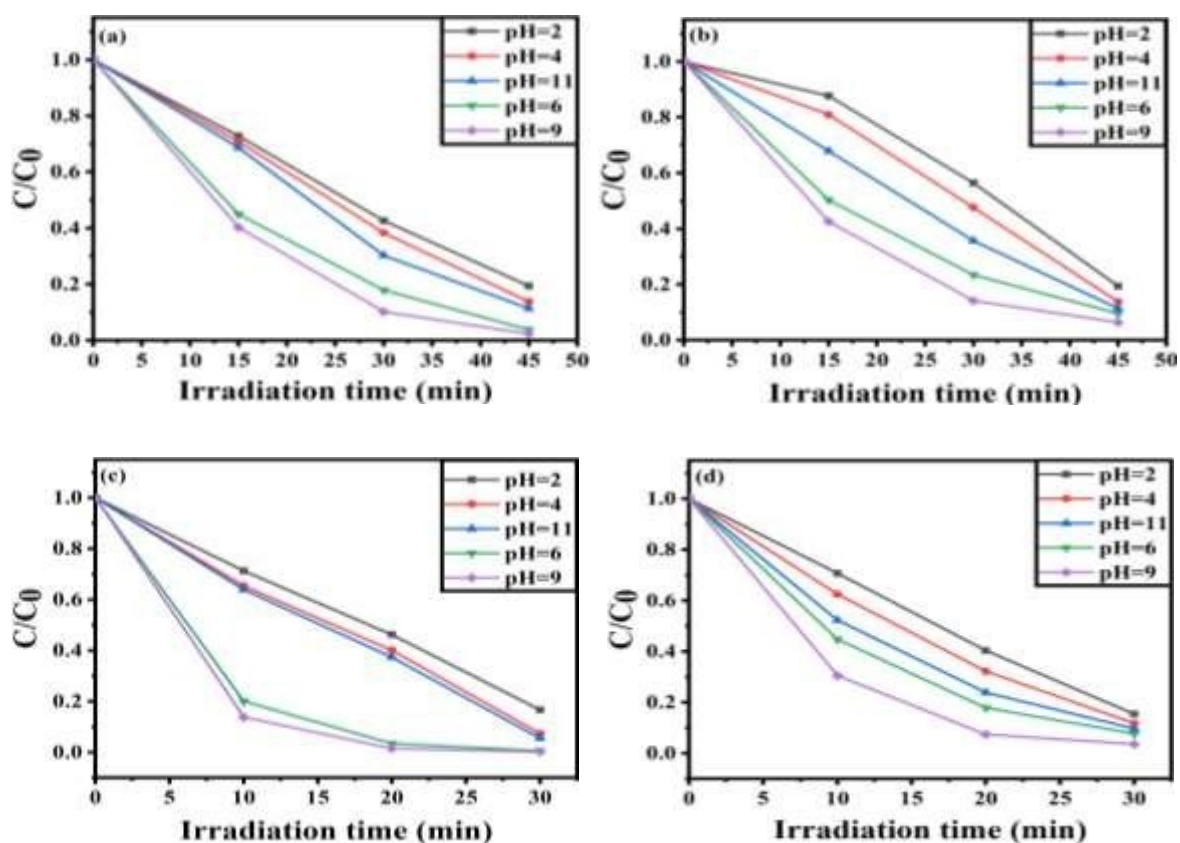

**Figure S10.** Influence of pH on photodegradation of (a) CV by 2 NZCN nanocomposite (b) CV by 2 SZCN nanocomposite (c) BG by 2 NZCN nanocomposite and (d) BG by 2SZCN nanocomposite (Reaction conditions:  $[Dye] = 100 \text{ mg/L}$ , Catalyst = 200mg/L,  $T = 25 \text{ }^\circ\text{C}$ ).

### Characterization of recovered catalyst:

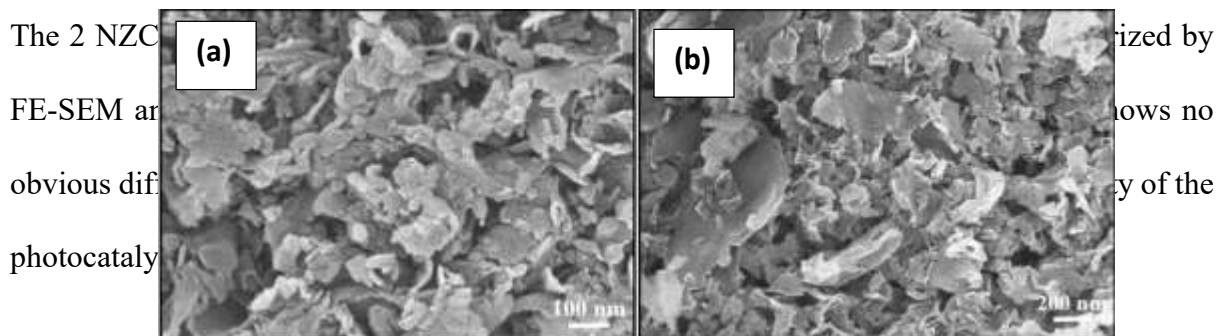

**Figure S11.** FE-SEM image of recovered (a) 2 NZCN nanocomposites (b) 2 SZCN nanocomposite.

In order to investigate the chemical composition variation of the 2 NZCN and 2SZCN nanocomposite after the photodegradation reaction, XPS measurements were done on (ESCALAB Xi+, Thermo Fisher Scientific Pvt. Ltd., UK) which shows no noticeable change even after seventh catalytic cycle, indicating their high chemical stability in photodegradation process as depicted in Fig. S11 (a, b, c, d, e) and Fig. S12 (a, b, c, d, e, f) respectively. The XPS survey spectrum of 2NZCN nanocomposite shows the presence of C 1s, N 1s, O 1s and N 2p elements as depicted in Fig. S11 (a). Similarly, the XPS survey spectrum of 2SZCN nanocomposite indicates the presence of C 1s, N 1s, O 1s, N 2p and S 2p elements as depicted



in Fig. S12 (a).

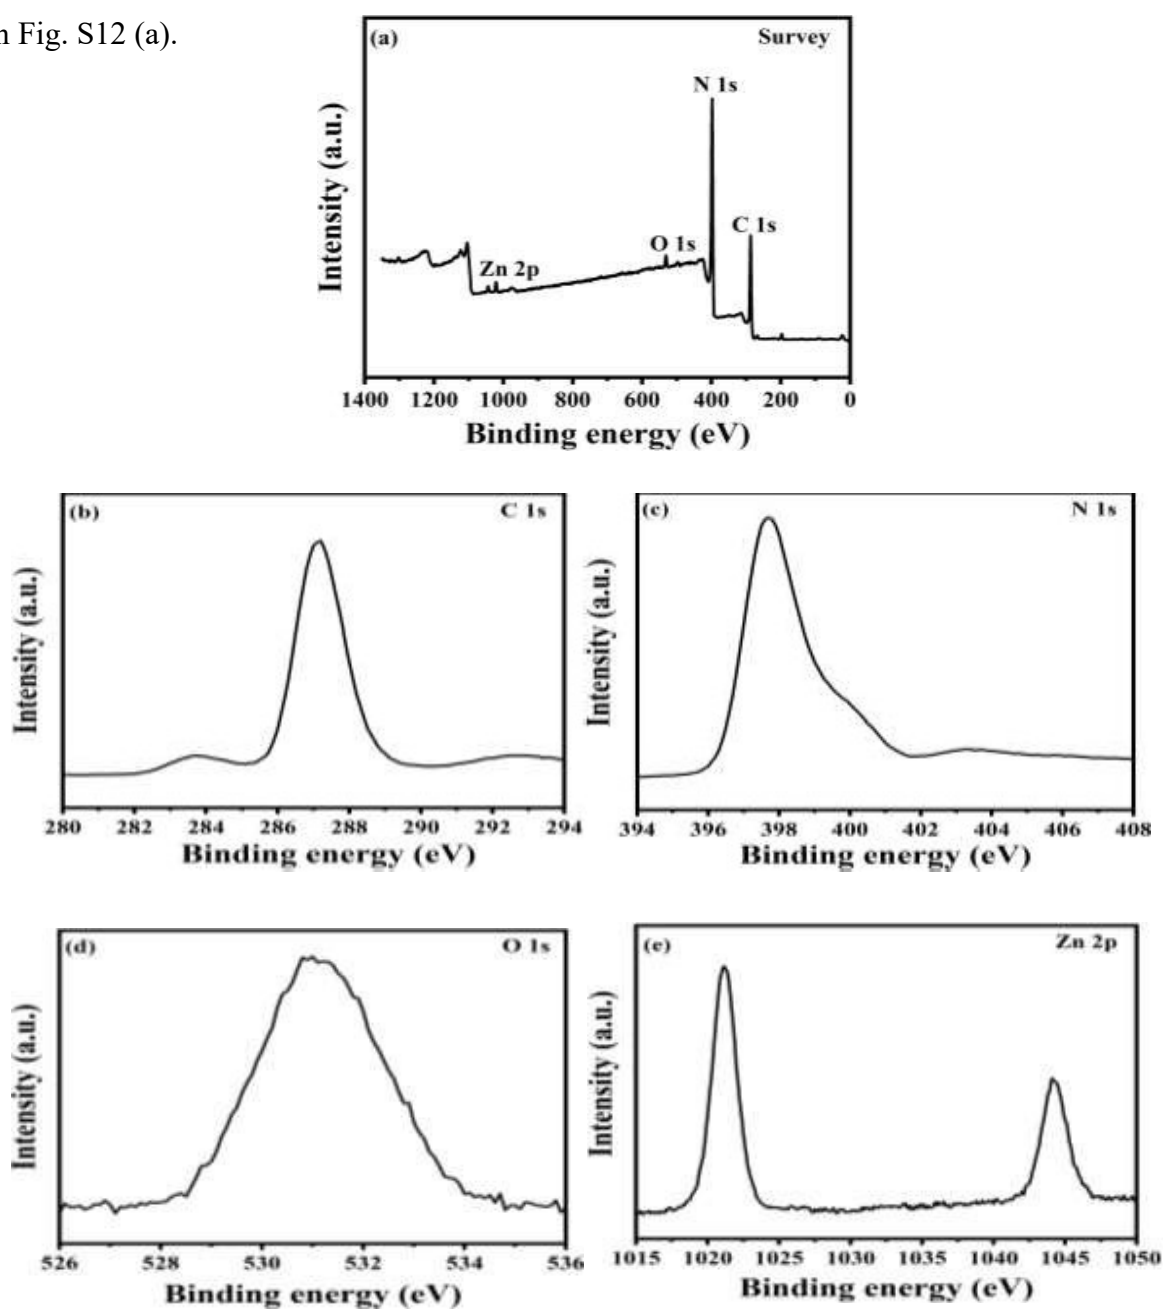

**Figure S12.** (a) XPS survey spectra of recovered 2 NZCN nanocomposite, (b) C 1s XPS spectra, (c) N 1s XPS spectra, (d) O 1s XPS spectra and (e) Zn 2p XPS spectra of recovered 2 NZCN

nanocomposite.

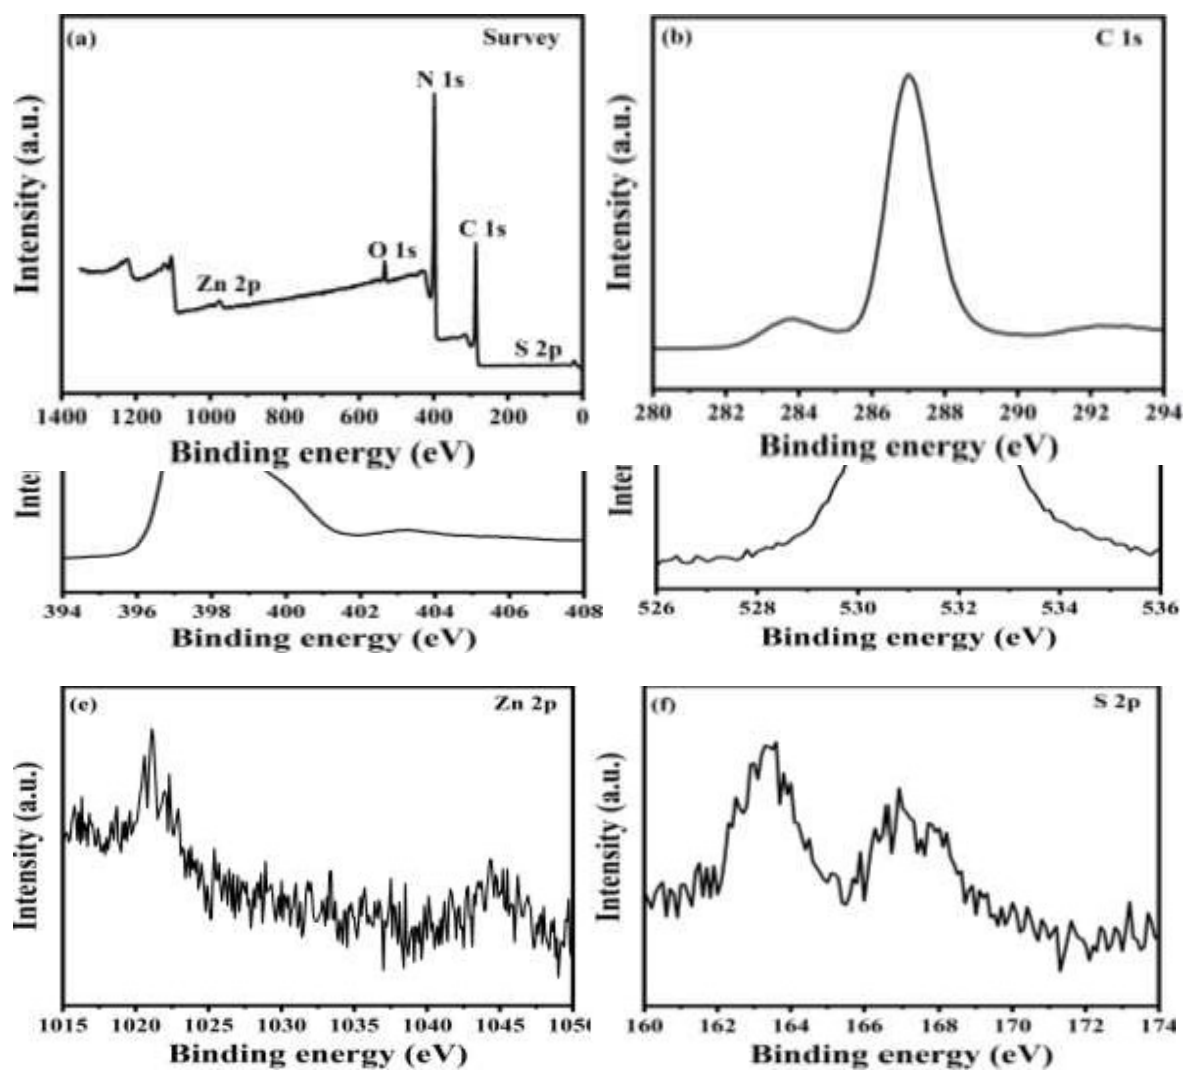

**Figure S13.** (a) XPS survey spectra of recovered 2 SZCN nanocomposite, (b) C 1s XPS spectra, (c) N 1s XPS spectra, (d) O1s XPS spectra, (e) Zn 2p XPS spectra and (f) S 2p XPS spectra of

recovered 2 NZCN nanocomposite.

**Table S2.** Comparison of different photocatalysts towards photocatalytic degradation of Crystal violet and Brilliant green.

| <b>Photocatalytic degradation of Brilliant green dye molecule</b> |                   |                   |                      |                     |                  |
|-------------------------------------------------------------------|-------------------|-------------------|----------------------|---------------------|------------------|
| <b>Photocatalyst</b>                                              | <b>Conc.(ppm)</b> | <b>Time (min)</b> | <b>% Degradation</b> | <b>Light source</b> | <b>Reference</b> |
| N-ZnO-GO                                                          | 20                | 90                | 100                  | Visible             | [1]              |
| Ag <sub>8</sub> SnS <sub>6</sub>                                  | 10                | 90                | 92.3                 | Tungsten            | [2]              |
| Cu- and Ag-doped ZnO                                              | 10                | 180               | 100                  | UV                  | [3]              |
| (ZnO-TiO <sub>2</sub> )- $\beta$ -CD                              | 20                | 180               | 99                   | Visible             | [4]              |
| Mn-CDSe QDS                                                       | 10                | 90                | 86.5                 | Sunlight            | [5]              |
| Sr-TiO <sub>2</sub>                                               | 25                | 60                | 96                   | UV                  | [6]              |
| Fe <sub>3</sub> O <sub>4</sub> /CdS-ZnS                           | 10                | 60                |                      | Visible             | [7]              |
| CeO <sub>2</sub> /Zeolite-NaX                                     | 10                | 180               | 94.8                 | Visible             | [8]              |
| ZnO                                                               | 20.7 $\mu$ M      | 60                | 94.3                 | MW/UV               | [9]              |
| ZnS quantum dots                                                  | 10                | 80                | 88                   | Solar               | [10]             |
| N-doped ZnO@g-C <sub>3</sub> N <sub>4</sub>                       | <b>100</b>        | <b>30</b>         | <b>99.3</b>          | <b>Visible</b>      | <b>This work</b> |
| S-doped ZnO@g-C <sub>3</sub> N <sub>4</sub>                       | <b>100</b>        | <b>30</b>         | <b>92.3</b>          |                     |                  |
| <b>Photocatalytic degradation of Crystal violet dye molecule</b>  |                   |                   |                      |                     |                  |
| <b>Photocatalyst</b>                                              | <b>Conc.(ppm)</b> | <b>Time (min)</b> | <b>% Degradation</b> | <b>Light source</b> | <b>Reference</b> |
| Bi <sub>2</sub> WO <sub>6</sub>                                   | 50                | 4320              | 99.8                 | UV                  | [11]             |
| BiO <sub>x</sub> Cl <sub>y</sub> /BiO <sub>m</sub> I <sub>n</sub> | 10                | 720               | 99.5                 | Visible             | [12]             |
| Cu doped ZnO                                                      | 10                | 210               | 100                  | UV-Visible          | [13]             |
| Ag <sup>+</sup> doped TiO <sub>2</sub>                            | 20                | 600               | 88                   | Solar               | [14]             |
| ZnO                                                               | 10                | 80                | 96                   | UV                  | [15]             |
| N-doped ZnO@g-C <sub>3</sub> N <sub>4</sub>                       | <b>100</b>        | <b>45</b>         | <b>96.2</b>          | <b>Visible</b>      | <b>This work</b> |
| S-doped ZnO@g-C <sub>3</sub> N <sub>4</sub>                       | <b>100</b>        | <b>45</b>         | <b>90.4</b>          |                     |                  |

## References

1. C.N. Peter, W.W Anku, R. Sharma, G.M. Joshi, S.K. Shukla and P.P. Govender, *Ionics*, 2019, 25, 327-339.

2. B.H. Shambharkar and A.P. Chowdhury, RSC Adv, 2016, 6, 10513–10519.
3. A. Gnanaprakasam, V. Sivakumar and M. Thirumarimurugan, Water Sci Technol, 2016, 74, 1426–1435.
4. P. Velusamy and G. Lakshmi, India J Chem, 2017, 56, 43–49.
5. N. Thirugnanam and D. Govindarajan, Int J Recent Sci Res, 2016, 7, 13377–13382.
6. S. Sood, A. Umar, M.S. Kumar, A.S.K. Sinha and S.K. Kumar, Ceram Int., 2015, 41, 3533–3540.
7. F. Soltani-nezhad, A. Saljooqi, A. Mostafavi and T. Shamspur, Ecotoxicol. Environ. Safe., 2020, 189, 109886.
8. 37. P. Huo, M. Zhou, Y. Tang, X. Liu, C. Ma, L. Yu and Y. Yan, J. Alloys Compd. 2016, 670, 198-209.
9. V.L. Gole and A. Priya, J. Water Process Eng., 2017, 19, 101-105.
10. S. Kaur, S. Sharma, A. Umar, S. Singh, S.K. Mehta and S.K. Kansal, Superlattices Microstruct., 2017, 103, 365-375.
11. S. Kumar, V. Sharma, K. Bhattacharyya, V. Krishnan, Mater. Chem. Front., 2017, 1, 1093-1106.
12. Y-R. Jianga, H-P. Lina, W-H Chungb, Y-M. Daia, W-Y. Linb and C-C. Chena, J. Hazard. Mater., 2015, 283, 787–805.
13. M. Mittal, M. Sharma and O.P. Pandey, Sol. Energy, 2014, 110, 386–397.
14. C. Sahoo, A.K. Gupta and A. Pal, Dyes Pigm., 2005, 66, 189-196.
15. S. Ameen, M. S. Akhtar, M. Nazim, H-S. Shin, Mater. Lett., 2013, 96, 228–232.
